# Supplementary material for: Using qPCR to compare the detection of Plasmodium vivax oocysts and sporozoites in Anopheles farauti mosquitoes between two DNA extraction methods
Source: bioRxiv or medRxiv preprint supplement (doi:10.1101/2022.11.15.22282365), 2022-11-18
Supplement: Supplementary file [file media-1.pdf]

Supplementary 1

**Table 1.** Oocyst counts and whether they were processed by heating or DNA extraction.

| <b>Number of oocyst/mosquito</b> | <b>Number of Mosquitoes</b> | <b>Heating / DNA extraction</b> |
|----------------------------------|-----------------------------|---------------------------------|
| 1                                | 17                          | Heating                         |
| 2                                | 5                           | Heating                         |
| 3                                | 6                           | Heating                         |
| 4                                | 4                           | Heating                         |
| 5                                | 2                           | Heating                         |
| 6                                | 1                           | Heating                         |
| 7                                | 1                           | Heating                         |
| 10                               | 1                           | Heating                         |
| Pools                            | 36                          | Heating                         |
| 1                                | 17                          | DNA extraction                  |
| 2                                | 4                           | DNA extraction                  |
| 3                                | 4                           | DNA extraction                  |
| 4                                | 5                           | DNA extraction                  |
| 6                                | 1                           | DNA extraction                  |
| 8                                | 1                           | DNA extraction                  |
| 13                               | 1                           | DNA extraction                  |
| 14                               | 1                           | DNA extraction                  |
| 46                               | 1                           | DNA extraction                  |
| Pools                            | 36                          | DNA extraction                  |

**Table 2.** Sporozoites classification and whether they were processed by heating or DNA extraction.

| <b>Sporozoite classification*</b> | <b>Number of Mosquitoes</b> | <b>Heating / DNA extraction</b> |
|-----------------------------------|-----------------------------|---------------------------------|
| High                              | 17                          | Heating                         |
| Moderate                          | 9                           | Heating                         |
| Low                               | 4                           | Heating                         |
| Negative                          | 8                           | Heating                         |
| High                              | 17                          | DNA extraction                  |
| Moderate                          | 9                           | DNA extraction                  |

|          |   |                |
|----------|---|----------------|
| Low      | 4 | DNA extraction |
| Negative | 8 | DNA extraction |

---

\* High >100 sporozoites, Moderate 20 -100, Low 1-20 sporozoites

## Supplementary 2

**Table 1.** Primer sequences of for the qPCR assay to detect *P. falciparum* and *P. vivax* parasites

| Species              | Primer <sup>1</sup> | Sequence (5' - 3')          |
|----------------------|---------------------|-----------------------------|
| <i>P. falciparum</i> | <b>Pf_fwd</b>       | TATTGCTTTTGAGAGGTTTGTACTTTG |
|                      | <b>Pf_rev</b>       | ACCTCTGACATCTGAATACGAATGC   |
| <i>P. vivax</i>      | <b>Pv_fwd</b>       | GCTTTGTAATTGGAATGATGGGAAT   |
|                      | <b>Pv_rev</b>       | ATGCGCACAAAGTCGATACGAAG     |

**Table 2.** Probe sequences for the qPCR assay to detect *P. falciparum* and *P. vivax* parasites.

| Species              | Probe <sup>2</sup> | Sequence (5' - 3')                |
|----------------------|--------------------|-----------------------------------|
| <i>P. falciparum</i> | <b>Pf probe</b>    | 6FAM-ACGGGTAGTCATGATTGAGTT-MGBNFQ |
| <i>P. vivax</i>      | <b>Pv probe</b>    | VIC-AGCAACGCTTCTAGCTTA -MGBNFQ    |

**Table 3.** The reaction mix for the qPCR

| qPCR Reaction mix                       |
|-----------------------------------------|
| Total volume 14μL                       |
| 2X Roche Master mix <sup>3</sup>        |
| 350nM per primer ( forward and reverse) |
| 350nM per probe ( forward and reverse)  |
| 4μL of DNA                              |

**Table 4.** The cycling conditions for the qPCR.

| Thermo profile      |      |       |      |
|---------------------|------|-------|------|
| <b>Hold</b>         | 50°C | 2min  |      |
| <b>Hold</b>         | 95°C | 15min |      |
| <b>Denaturation</b> | 95°C | 15sec | X 45 |
| <b>Annealing</b>    | 60°C | 1min  |      |

<sup>1</sup>. Integrated DNA Technologies (IDT), New Zealand

<sup>2</sup>. LifeScience Roche, NSW, Australia

<sup>3</sup>. TaqMan MGB Probes ThermoFisher Scientific, Auckland, New Zealand
